# Supplementary material for: A novel method for rapid detection of a Helicobacter pylori infection using a γ-glutamyltranspeptidase-activatable fluorescent probe
Source: PubMed Central journal article supplement (PMC6603024; doi:10.1038/s41598-019-45768-x), 2019-07-01
Supplement: 41598_2019_45768_MOESM1_ESM.pdf [file 41598_2019_45768_MOESM1_ESM.pdf]

## Supplemental information

### A novel method for rapid detection of a *Helicobacter pylori* infection using a $\gamma$ -glutamyltranspeptidase-activatable fluorescent probe

Taro Akashi<sup>1</sup>, Hajime Isomoto<sup>2\*</sup>, Kayoko Matsushima<sup>1</sup>, Mako Kamiya<sup>3,4</sup>, Tsutomu Kanda<sup>2</sup>, Masayuki Nakano<sup>5,6</sup>, Takumi Onoyama<sup>2</sup>, Masashi Fujii<sup>2</sup>, Junko Akada<sup>7</sup>, Yuko Akazawa<sup>1</sup>, Ken Ohnita<sup>1</sup>, Fuminao Takeshima<sup>1</sup>, Kazuhiko Nakao<sup>1</sup>, Yasuteru Urano<sup>3,4\*</sup>

<sup>1</sup>Department of Gastroenterology and Hepatology, Nagasaki University Graduate School of Biomedical Sciences, 1-7-1 Sakamoto, Nagasaki 852-8501, Japan

<sup>2</sup>Division of Medicine and Clinical Science, Faculty of Medicine, Tottori University, 36-1 Nishi-cho, Yonago 683-8504, Japan

<sup>3</sup>Graduate School of Medicine, The University of Tokyo, 7-3-1 Hongo, Bunkyo-ku, Tokyo 113-0033, Japan.

<sup>4</sup>Graduate School of Pharmaceutical Sciences, The University of Tokyo, 7-3-1 Hongo, Bunkyo-ku, Tokyo 113-0033, Japan

<sup>5</sup>Department of Bacteriology, Institute of Tropical Medicine, Nagasaki University

<sup>6</sup>Department of International Health, Institute of Tropical Medicine, Nagasaki University

<sup>7</sup>Department of Environmental and Preventive Medicine, Oita University Faculty of Medicine

**The relationship between *ex vivo* gGlu-HMRG imaging assay results and extent of atrophic gastritis**

| <i>ex vivo</i> gGlu-HMRG imaging assay                                                                    | Extent of atrophy |     |     |     |     |     |     |
|-----------------------------------------------------------------------------------------------------------|-------------------|-----|-----|-----|-----|-----|-----|
|                                                                                                           | C-0               | C-1 | C-2 | C-3 | O-1 | O-2 | O-3 |
| Antrum, FIV-15 $\geq$ 43.667                                                                              | 3                 | 1   | 6   | 8   | 3   | 3   | 0   |
| Antrum, FIV-15 < 43.667                                                                                   | 11                | 0   | 2   | 1   | 2   | 2   | 0   |
|                                                                                                           |                   |     |     |     |     |     |     |
| Stomach body, FIV-15 $\geq$ 18.316                                                                        | 2                 | 1   | 5   | 6   | 5   | 4   | 0   |
| Stomach body, FIV-15 < 18.316                                                                             | 12                | 0   | 3   | 3   | 0   | 1   | 0   |
| FI, fluorescence intensities; FIV-15, values by subtracting FI 15 minutes after sprinkling with gGlu-HMRG |                   |     |     |     |     |     |     |
| gGlu-HMRG, $\gamma$ -glutamyl hydroxymethyl rhodamine green                                               |                   |     |     |     |     |     |     |
